# Supplementary material
Source: Elsevier journal article supplement (https://www.sciencedirect.com/science/article/pii/S0033833821001521)
Supplement: mmc1 [file S0033833821001521:mmc1.doc]

Anexo 1. Cuestionario de prevalencia del síndrome de desgaste en radiólogos españoles

A. Valoración cualitativa del grado del síndrome de desgaste profesional a través del Maslach Burnout Inventory Human Services Survey (MBI-HSS)

B. Condiciones sociodemográficas y laborales:

1. Edad

2. Género

3. Comunidad autónoma

4. Hospital (primario, secundario, terciario) o centro de especialidades

5. Subespecialidad dentro de la radiología

6. Se realiza o no docencia en el lugar de trabajo

7. Se realizan guardias (en caso afirmativo promedio guardias al mes)

8. Antigüedad de años de ejercicio como radiólogo:

a. 0-4 años

b. 5-9 años

c. 10-19 años

d. 20-29 años

e. >30 años

9. Deslizamiento de jornada laboral (en caso de necesidad se trabaja por la tarde)

10. Trabajo extra en hospitales/clínicas privadas

11. Incentivos

12. Ingreso anual aproximadamente:

a.<25 000 €

b. 25 000-45 000 €

c. >45 000 €

13. En periodo de vacaciones se hace sustitución de personal

C. Percepción/opinión de los radiólogos sobre las posibles causas de estrés y factores que podrían mejorar su situación

1. ¿Cómo se relaja normalmente?

a. Deporte

b. Viajando

c. Actividades artísticas (fotografía, pintura, música, teatro, etc.)

d. Pasar tiempo con la familia y amigos

e. Otros

2. Posibles causas de estrés:

a. Falta de control sobre el trabajo

b. ¿Está conforme con su salario?

c. El ordenador/programa se cuelga fácilmente

d. Los compañeros no aprecian mi trabajo adecuadamente

e. Mi trabajo no cumple con mis expectativas

f. Trabajo demasiado caótico, me agota

g. El trabajo me aburre

h. Me siento aislado/a en el trabajo

i. Gran número de estudios asignados por día

j. Las guardias de urgencias

k. El trabajo no me permite pasar suficiente tiempo con mi familia

l. El trato con otras especialidades

m. Me siento aislado

n. Otras

3. Opciones que mejorarían mi estado de ánimo:

a. Mejora de aptitudes de comunicación

b. Me gustaría establecer una relación con mis compañeros fuera del trabajo

c. Disminuir las horas de guardia

d. Mejoras en la organización del servicio:

i. Establecer la actividad a realizar de cada profesional diariamente

ii. Aumentar el número de personas asignadas para cada una de las actividades

iii. Fomentar el trabajo en equipo

e. Disminuir estudios asignados por profesional o aumentar el personal

f. Cambiar de trabajo
